# Supplementary material for: The Role of the A-Site Cation on the Bifunctional Electrocatalytic Activities of Ln0.5Sr0.5CoO3-δ (Ln = La, Pr and Sm) for Rechargeable Zinc–Air Batteries
Source: MDPI journal article supplement (doi:10.3390/catal13030483), 2023-02-27
Supplement: s1 [file s1]

Archive with 1 entries (1 files):
- catalysts-2154737-supplementary.pdf
